# Supplementary material for: A novel phosphate with CoII square planar coordination, BaCo0.5Fe(PO4)2: structural and magnetic features
Source: Royal Society of Chemistry journal article supplement (doi:10.1039/d3dt03539e), 2023-12-15
Supplement: d3dt03539e1.pdf [file d3dt03539e1.pdf]

**Supporting information for**  
**A novel phosphate with Co<sup>II</sup> square planar coordination, BaCo<sub>0.5</sub>Fe(PO<sub>4</sub>)<sub>2</sub>:**  
**Structural and magnetic features**

Fouad Alloun <sup>a</sup>, Mohammed Hadouchi <sup>a,\*</sup>, Sirine El Arni, Abderrazzak Assani <sup>a</sup>, Mohamed Saadi <sup>a</sup>, Mimoun El Marssi <sup>b</sup>, Abdelilah Lahmar <sup>b</sup>, and Lahcen El Ammari <sup>a</sup>

<sup>a</sup> *Laboratoire de Chimie Appliquée des Matériaux, Centre des Sciences des Matériaux, Faculty of Science, Mohammed V University in Rabat, Avenue Ibn Battouta, BP 1014, Rabat, Morocco*

<sup>b</sup> *Laboratoire de Physique de la Matière Condensée, 33 Rue saint-Leu, 80033 Amiens, France*

**\*Corresponding author:**

[m.hadouchi@um5r.ac.ma](mailto:m.hadouchi@um5r.ac.ma) (M. Hadouchi)

**Table S1:** Atomic displacement parameters (Å<sup>2</sup>) of BCFP

**Table S2 :** Geometric parameters (Å, °) of BCFP

**Table S3:** Refined profile parameters of BCFP phosphate powder

**Fig. S1:** EDS spectrum showing the elemental composition of the BCFP phosphate powder.

**Table S1:** Atomic displacement parameters ( $\text{\AA}^2$ ) of BCFP

|      | $U^{11}$     | $U^{22}$     | $U^{33}$     | $U^{12}$      | $U^{13}$      | $U^{23}$      |
|------|--------------|--------------|--------------|---------------|---------------|---------------|
| Ba1  | 0.01461 (8)  | 0.01338 (8)  | 0.01214 (7)  | -0.00609 (6)  | 0.00058 (6)   | 0.00037 (6)   |
| Ba2  | 0.01249 (7)  | 0.01281 (7)  | 0.00904 (7)  | -0.00458 (6)  | 0.00042 (5)   | 0.00033 (5)   |
| Ba3  | 0.01309 (8)  | 0.01995 (9)  | 0.01940 (9)  | 0.00516 (6)   | 0.00557 (6)   | 0.00018 (7)   |
| Fe1  | 0.00654 (15) | 0.00758 (15) | 0.00719 (16) | -0.00002 (12) | -0.00090 (12) | 0.00091 (12)  |
| Fe2  | 0.01154 (17) | 0.00665 (16) | 0.01011 (17) | 0.00223 (13)  | -0.00064 (13) | -0.00109 (13) |
| Fe3  | 0.00766 (16) | 0.00649 (15) | 0.00806 (16) | -0.00094 (12) | -0.00143 (13) | 0.00057 (12)  |
| Co1A | 0.0167 (9)   | 0.0092 (7)   | 0.0264 (11)  | 0.0032 (5)    | -0.0007 (6)   | 0.0069 (6)    |
| Co1B | 0.0167 (9)   | 0.0092 (7)   | 0.0264 (11)  | 0.0032 (5)    | -0.0007 (6)   | 0.0069 (6)    |
| Co2  | 0.00953 (16) | 0.01423 (18) | 0.01679 (19) | 0.00179 (13)  | 0.00131 (14)  | -0.00564 (14) |
| P1   | 0.0064 (3)   | 0.0071 (3)   | 0.0072 (3)   | 0.0006 (2)    | -0.0007 (2)   | -0.0011 (2)   |
| P2   | 0.0067 (3)   | 0.0081 (3)   | 0.0081 (3)   | -0.0001 (2)   | -0.0002 (2)   | 0.0014 (2)    |
| P3   | 0.0066 (3)   | 0.0060 (3)   | 0.0104 (3)   | 0.0002 (2)    | 0.0001 (2)    | 0.0018 (2)    |
| P4   | 0.0073 (3)   | 0.0062 (3)   | 0.0097 (3)   | 0.0013 (2)    | 0.0013 (2)    | 0.0011 (2)    |
| P5   | 0.0080 (3)   | 0.0077 (3)   | 0.0092 (3)   | 0.0004 (2)    | -0.0007 (2)   | 0.0011 (2)    |
| P6   | 0.0055 (3)   | 0.0069 (3)   | 0.0082 (3)   | -0.0001 (2)   | 0.0011 (2)    | 0.0009 (2)    |
| O1   | 0.0110 (9)   | 0.0158 (9)   | 0.0123 (9)   | 0.0029 (7)    | 0.0042 (7)    | 0.0007 (7)    |
| O2   | 0.0143 (9)   | 0.0120 (9)   | 0.0164 (10)  | -0.0039 (7)   | 0.0016 (8)    | -0.0053 (7)   |
| O3   | 0.0176 (10)  | 0.0290 (12)  | 0.0093 (9)   | 0.0063 (9)    | -0.0051 (8)   | -0.0007 (8)   |
| O4   | 0.0116 (9)   | 0.0079 (8)   | 0.0159 (9)   | 0.0018 (7)    | 0.0046 (7)    | 0.0002 (7)    |
| O5   | 0.0208 (12)  | 0.0355 (14)  | 0.0346 (14)  | -0.0038 (10)  | -0.0178 (10)  | -0.0012 (11)  |
| O6   | 0.0172 (10)  | 0.0083 (8)   | 0.0176 (10)  | 0.0025 (7)    | -0.0021 (8)   | -0.0011 (7)   |
| O7   | 0.0434 (16)  | 0.0377 (15)  | 0.0193 (12)  | 0.0179 (12)   | 0.0180 (11)   | 0.0074 (10)   |
| O8   | 0.0172 (10)  | 0.0106 (9)   | 0.0380 (14)  | -0.0032 (8)   | 0.0060 (9)    | 0.0053 (9)    |
| O9   | 0.0161 (9)   | 0.0114 (9)   | 0.0130 (9)   | -0.0008 (7)   | 0.0052 (7)    | 0.0028 (7)    |
| O10  | 0.0072 (8)   | 0.0277 (11)  | 0.0102 (9)   | -0.0024 (8)   | -0.0005 (7)   | 0.0035 (8)    |
| O11  | 0.0177 (10)  | 0.0142 (10)  | 0.0225 (11)  | 0.0068 (8)    | 0.0033 (8)    | 0.0102 (8)    |
| O12  | 0.0140 (9)   | 0.0122 (9)   | 0.0257 (11)  | -0.0022 (7)   | 0.0035 (8)    | -0.0083 (8)   |
| O13  | 0.0083 (9)   | 0.0167 (9)   | 0.0143 (9)   | 0.0050 (7)    | 0.0026 (7)    | 0.0044 (7)    |
| O14  | 0.0105 (8)   | 0.0084 (8)   | 0.0101 (8)   | 0.0015 (7)    | 0.0004 (7)    | -0.0016 (6)   |
| O15  | 0.0135 (9)   | 0.0137 (9)   | 0.0131 (9)   | 0.0001 (7)    | -0.0035 (7)   | -0.0044 (7)   |
| O16  | 0.0170 (10)  | 0.0131 (10)  | 0.0362 (13)  | 0.0039 (8)    | 0.0121 (9)    | 0.0132 (9)    |
| O17  | 0.0118 (9)   | 0.0072 (8)   | 0.0165 (9)   | -0.0013 (7)   | 0.0000 (7)    | -0.0014 (7)   |
| O18  | 0.0144 (10)  | 0.0362 (14)  | 0.0373 (15)  | 0.0046 (10)   | 0.0056 (10)   | 0.0183 (11)   |
| O19  | 0.0201 (10)  | 0.0164 (10)  | 0.0160 (10)  | -0.0040 (8)   | -0.0083 (8)   | 0.0049 (8)    |
| O20  | 0.0556 (17)  | 0.0126 (10)  | 0.0153 (11)  | -0.0096 (10)  | 0.0096 (11)   | -0.0051 (8)   |
| O21  | 0.0076 (8)   | 0.0251 (11)  | 0.0117 (9)   | -0.0048 (8)   | -0.0001 (7)   | 0.0004 (8)    |
| O22  | 0.0122 (9)   | 0.0104 (8)   | 0.0124 (9)   | 0.0020 (7)    | 0.0036 (7)    | 0.0044 (7)    |

|     |             |             |             |             |            |             |
|-----|-------------|-------------|-------------|-------------|------------|-------------|
| O23 | 0.0156 (10) | 0.0113 (9)  | 0.0186 (10) | 0.0059 (7)  | 0.0032 (8) | 0.0033 (8)  |
| O24 | 0.0165 (10) | 0.0175 (10) | 0.0128 (9)  | -0.0083 (8) | 0.0015 (8) | -0.0046 (8) |

**Table S2** : Geometric parameters (Å, °) of BCFP

| Distance (Å)            |             |                       |             |
|-------------------------|-------------|-----------------------|-------------|
| Ba1—O23 <sup>i</sup>    | 2.711 (2)   | Fe3—O21               | 1.9581 (19) |
| Ba1—O4                  | 2.7210 (19) | Fe3—O5 <sup>vii</sup> | 1.963 (2)   |
| Ba1—O13 <sup>ii</sup>   | 2.773 (2)   | Fe3—O4 <sup>vii</sup> | 2.009 (2)   |
| Ba1—O12 <sup>ii</sup>   | 2.793 (2)   | Fe3—O2 <sup>ix</sup>  | 2.0484 (19) |
| Ba1—O22 <sup>iii</sup>  | 2.8599 (19) | Fe3—O11 <sup>xi</sup> | 2.055 (2)   |
| Ba1—O1                  | 2.881 (2)   | Co1A—O16 <sup>i</sup> | 1.901 (2)   |
| Ba1—O15 <sup>ii</sup>   | 3.049 (2)   | Co1A—O16              | 1.901 (2)   |
| Ba1—O2 <sup>iv</sup>    | 3.066 (2)   | Co1A—O18              | 2.205 (3)   |
| Ba1—O24 <sup>iii</sup>  | 3.096 (2)   | Co1A—O18 <sup>i</sup> | 2.205 (3)   |
| Ba1—O5                  | 3.290 (3)   | Co1B—O16              | 1.924 (3)   |
| Ba2—O14 <sup>v</sup>    | 2.6514 (19) | Co1B—O16 <sup>i</sup> | 1.945 (3)   |
| Ba2—O10                 | 2.674 (2)   | Co1B—O18              | 2.137 (4)   |
| Ba2—O14 <sup>vi</sup>   | 2.8181 (19) | Co1B—O18 <sup>i</sup> | 2.328 (4)   |
| Ba2—O19 <sup>vii</sup>  | 2.842 (2)   | Co2—O1                | 1.9547 (19) |
| Ba2—O20 <sup>vii</sup>  | 2.855 (2)   | Co2—O8 <sup>xii</sup> | 2.063 (2)   |
| Ba2—O9 <sup>v</sup>     | 2.871 (2)   | Co2—O24 <sup>i</sup>  | 2.093 (2)   |
| Ba2—O22 <sup>vii</sup>  | 2.965 (2)   | Co2—O23 <sup>ii</sup> | 2.104 (2)   |
| Ba2—O11 <sup>v</sup>    | 2.985 (2)   | Co2—O18 <sup>ii</sup> | 2.237 (3)   |
| Ba2—O6 <sup>vi</sup>    | 3.005 (2)   | P1—O3                 | 1.519 (2)   |
| Ba2—O16 <sup>vi</sup>   | 3.210 (2)   | P1—O1                 | 1.523 (2)   |
| Ba3—O12                 | 2.584 (2)   | P1—O2                 | 1.532 (2)   |
| Ba3—O8 <sup>vii</sup>   | 2.766 (2)   | P1—O4                 | 1.5424 (19) |
| Ba3—O24 <sup>viii</sup> | 2.786 (2)   | P2—O7                 | 1.519 (2)   |
| Ba3—O15 <sup>vi</sup>   | 2.847 (2)   | P2—O5                 | 1.522 (2)   |
| Ba3—O21 <sup>viii</sup> | 2.850 (2)   | P2—O6                 | 1.523 (2)   |
| Ba3—O17                 | 2.917 (2)   | P2—O8                 | 1.526 (2)   |
| Ba3—O4 <sup>ix</sup>    | 2.984 (2)   | P3—O11                | 1.514 (2)   |
| Ba3—O2 <sup>ix</sup>    | 3.264 (2)   | P3—O10                | 1.527 (2)   |
| Ba3—O5 <sup>vii</sup>   | 3.320 (3)   | P3—O12                | 1.531 (2)   |
| Fe1—O3                  | 1.884 (2)   | P3—O9                 | 1.551 (2)   |
| Fe1—O6                  | 1.979 (2)   | P4—O16                | 1.508 (2)   |
| Fe1—O10 <sup>v</sup>    | 2.006 (2)   | P4—O13                | 1.524 (2)   |
| Fe1—O22 <sup>i</sup>    | 2.043 (2)   | P4—O15                | 1.545 (2)   |
| Fe1—O14 <sup>x</sup>    | 2.0904 (19) | P4—O14                | 1.5494 (19) |
| Fe1—O15 <sup>x</sup>    | 2.120 (2)   | P5—O17                | 1.524 (2)   |

|                        |             |        |           |
|------------------------|-------------|--------|-----------|
| Fe2—O7                 | 1.872 (2)   | P5—O18 | 1.527 (2) |
| Fe2—O17                | 1.9780 (19) | P5—O19 | 1.532 (2) |
| Fe2—O9                 | 1.987 (2)   | P5—O20 | 1.544 (2) |
| Fe2—O13                | 2.0250 (19) | P6—O23 | 1.522 (2) |
| Fe2—O19 <sup>vii</sup> | 2.060 (2)   | P6—O21 | 1.530 (2) |
| Fe2—O12                | 2.346 (2)   | P6—O24 | 1.531 (2) |
| Fe3—O20                | 1.947 (2)   | P6—O22 | 1.551 (2) |

---

**Angles (°)**


---

|                                        |             |                                          |             |
|----------------------------------------|-------------|------------------------------------------|-------------|
| O3—Fe1—O6                              | 118.72 (9)  | O16—Co1B—O18                             | 97.65 (14)  |
| O3—Fe1—O10 <sup>v</sup>                | 87.76 (9)   | O16 <sup>i</sup> —Co1B—O18               | 84.80 (13)  |
| O6—Fe1—O10 <sup>v</sup>                | 89.08 (9)   | O16—Co1B—O18 <sup>i</sup>                | 80.21 (12)  |
| O3—Fe1—O22 <sup>i</sup>                | 102.95 (9)  | O16 <sup>i</sup> —Co1B—O18 <sup>i</sup>  | 91.00 (13)  |
| O6—Fe1—O22 <sup>i</sup>                | 84.94 (8)   | O18—Co1B—O18 <sup>i</sup>                | 162.20 (7)  |
| O10 <sup>v</sup> —Fe1—O22 <sup>i</sup> | 169.24 (8)  | O1—Co2—O8 <sup>xii</sup>                 | 151.54 (9)  |
| O3—Fe1—O14 <sup>x</sup>                | 153.16 (9)  | O1—Co2—O24 <sup>i</sup>                  | 86.70 (8)   |
| O6—Fe1—O14 <sup>x</sup>                | 86.83 (8)   | O8 <sup>xii</sup> —Co2—O24 <sup>i</sup>  | 89.09 (9)   |
| O10 <sup>v</sup> —Fe1—O14 <sup>x</sup> | 84.40 (8)   | O1—Co2—O23 <sup>ii</sup>                 | 113.47 (8)  |
| O22 <sup>i</sup> —Fe1—O14 <sup>x</sup> | 86.35 (8)   | O8 <sup>xii</sup> —Co2—O23 <sup>ii</sup> | 94.66 (9)   |
| O3—Fe1—O15 <sup>x</sup>                | 86.02 (9)   | O24 <sup>i</sup> —Co2—O23 <sup>ii</sup>  | 90.09 (8)   |
| O6—Fe1—O15 <sup>x</sup>                | 155.03 (8)  | O1—Co2—O18 <sup>ii</sup>                 | 90.64 (8)   |
| O10 <sup>v</sup> —Fe1—O15 <sup>x</sup> | 95.64 (9)   | O8 <sup>xii</sup> —Co2—O18 <sup>ii</sup> | 73.77 (9)   |
| O22 <sup>i</sup> —Fe1—O15 <sup>x</sup> | 86.19 (8)   | O24 <sup>i</sup> —Co2—O18 <sup>ii</sup>  | 137.44 (9)  |
| O14 <sup>x</sup> —Fe1—O15 <sup>x</sup> | 69.33 (7)   | O23 <sup>ii</sup> —Co2—O18 <sup>ii</sup> | 129.12 (9)  |
| O7—Fe2—O17                             | 113.08 (11) | O3—P1—O1                                 | 109.85 (12) |
| O7—Fe2—O9                              | 99.26 (11)  | O3—P1—O2                                 | 111.55 (13) |
| O17—Fe2—O9                             | 147.05 (8)  | O1—P1—O2                                 | 113.26 (12) |
| O7—Fe2—O13                             | 92.89 (10)  | O3—P1—O4                                 | 110.18 (12) |
| O17—Fe2—O13                            | 94.67 (8)   | O1—P1—O4                                 | 104.67 (11) |
| O9—Fe2—O13                             | 89.69 (8)   | O2—P1—O4                                 | 107.06 (11) |
| O7—Fe2—O19 <sup>vii</sup>              | 95.48 (11)  | O7—P2—O5                                 | 110.89 (16) |
| O17—Fe2—O19 <sup>vii</sup>             | 81.86 (8)   | O7—P2—O6                                 | 112.27 (13) |
| O9—Fe2—O19 <sup>vii</sup>              | 89.17 (8)   | O5—P2—O6                                 | 110.74 (14) |
| O13—Fe2—O19 <sup>vii</sup>             | 171.62 (9)  | O7—P2—O8                                 | 105.23 (15) |
| O7—Fe2—O12                             | 163.04 (10) | O5—P2—O8                                 | 106.61 (15) |
| O17—Fe2—O12                            | 82.55 (8)   | O6—P2—O8                                 | 110.82 (12) |
| O9—Fe2—O12                             | 66.29 (8)   | O11—P3—O10                               | 113.82 (12) |
| O13—Fe2—O12                            | 78.74 (8)   | O11—P3—O12                               | 112.49 (13) |
| O19 <sup>vii</sup> —Fe2—O12            | 93.22 (8)   | O10—P3—O12                               | 109.96 (12) |
| O20—Fe3—O21                            | 92.00 (10)  | O11—P3—O9                                | 109.24 (12) |
| O20—Fe3—O5 <sup>vii</sup>              | 97.05 (12)  | O10—P3—O9                                | 108.97 (11) |
| O21—Fe3—O5 <sup>vii</sup>              | 169.03 (11) | O12—P3—O9                                | 101.61 (12) |
| O20—Fe3—O4 <sup>vii</sup>              | 174.27 (10) | O16—P4—O13                               | 115.24 (12) |

|                                          |            |            |             |
|------------------------------------------|------------|------------|-------------|
| O21—Fe3—O4 <sup>vii</sup>                | 82.93 (8)  | O16—P4—O15 | 110.34 (13) |
| O5 <sup>vii</sup> —Fe3—O4 <sup>vii</sup> | 87.71 (10) | O13—P4—O15 | 109.07 (11) |
| O20—Fe3—O2 <sup>ix</sup>                 | 91.96 (9)  | O16—P4—O14 | 108.49 (12) |
| O21—Fe3—O2 <sup>ix</sup>                 | 91.27 (9)  | O13—P4—O14 | 111.40 (11) |
| O5 <sup>vii</sup> —Fe3—O2 <sup>ix</sup>  | 82.27 (10) | O15—P4—O14 | 101.42 (11) |
| O4 <sup>vii</sup> —Fe3—O2 <sup>ix</sup>  | 85.50 (8)  | O17—P5—O18 | 111.59 (13) |
| O20—Fe3—O11 <sup>xi</sup>                | 87.41 (9)  | O17—P5—O19 | 113.22 (11) |
| O21—Fe3—O11 <sup>xi</sup>                | 87.25 (9)  | O18—P5—O19 | 111.27 (13) |
| O5 <sup>vii</sup> —Fe3—O11 <sup>xi</sup> | 99.30 (10) | O17—P5—O20 | 111.76 (12) |
| O4 <sup>vii</sup> —Fe3—O11 <sup>xi</sup> | 94.98 (8)  | O18—P5—O20 | 102.94 (16) |
| O2 <sup>ix</sup> —Fe3—O11 <sup>xi</sup>  | 178.37 (9) | O19—P5—O20 | 105.43 (13) |
| O16 <sup>i</sup> —Co1A—O16               | 180.0      | O23—P6—O21 | 110.36 (12) |
| O16 <sup>i</sup> —Co1A—O18               | 83.96 (9)  | O23—P6—O24 | 115.87 (12) |
| O16—Co1A—O18                             | 96.04 (9)  | O21—P6—O24 | 103.09 (11) |
| O16 <sup>i</sup> —Co1A—O18 <sup>i</sup>  | 96.04 (9)  | O23—P6—O22 | 109.83 (11) |
| O16—Co1A—O18 <sup>i</sup>                | 83.96 (9)  | O21—P6—O22 | 109.36 (11) |
| O18—Co1A—O18 <sup>i</sup>                | 180.0      | O24—P6—O22 | 108.02 (11) |
| O16—Co1B—O16 <sup>i</sup>                | 158.68 (7) |            |             |

Symmetry codes: (i)  $-x, -y+1, -z+1$ ; (ii)  $x, -y+3/2, z+1/2$ ; (iii)  $x, -y+1/2, z+1/2$ ; (iv)  $-x+1, y-1/2, -z+3/2$ ; (v)  $-x+1, -y+2, -z+1$ ; (vi)  $x+1, y, z$ ; (vii)  $-x+1, -y+1, -z+1$ ; (viii)  $-x+1, y+1/2, -z+1/2$ ; (ix)  $x, -y+3/2, z-1/2$ ; (x)  $-x, -y+2, -z+1$ ; (xi)  $x, y-1, z$ ; (xii)  $-x, y+1/2, -z+3/2$ .

**Table S3:** Refined profile parameters of BCFP phosphate powder

|                               |                                                                                  |
|-------------------------------|----------------------------------------------------------------------------------|
| Chemical formula              | <b>BaCo<sub>0.5</sub>Fe(PO<sub>4</sub>)<sub>2</sub></b>                          |
| a, b, c (Å), $\beta$ (°)      | 8.6913 (2), 9.9764 (2), 21.9029 (1), 93.133 (1)                                  |
| V (Å <sup>3</sup> )           | 1896.3 (2)                                                                       |
| Data collection               |                                                                                  |
| Diffractionmeter              | Shimadzu 6100                                                                    |
| Temperature (K)               | 298                                                                              |
| Radiation type                | Cu K $\alpha$ ( $\lambda$ = 1.54056 Å)                                           |
| 2 $\Theta$ values (°)         | 2 $\Theta_{\min}$ = 10, 2 $\Theta_{\max}$ = 100, 2 $\Theta_{\text{step}}$ = 0.02 |
| Refinement                    |                                                                                  |
| R factors and goodness of fit | $R_p = 5.46$ , $R_{wp} = 7.21$ , $\chi^2 = 1.68$                                 |
| No. of fitted parameters      | 21                                                                               |
| No. data points               | 4501                                                                             |

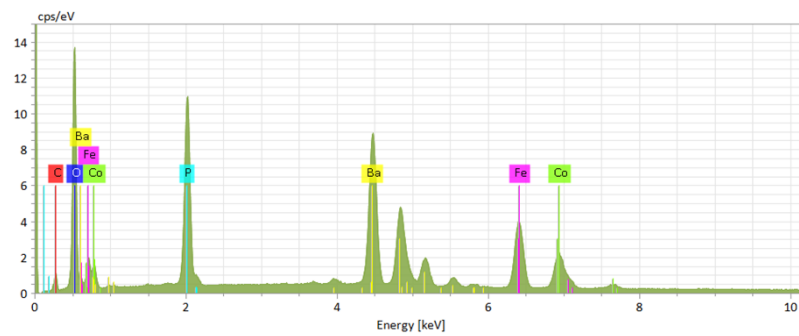

**Fig. S1:** EDS spectrum showing the elemental composition of the BCFP phosphate powder.
